# Supplementary material
Source: HighWire-hosted journal article supplement (http://molpharm.aspetjournals.org/highwire/filestream/77140/field_highwire_adjunct_files/0/Revised_supplemantary_infoKarasawa_et_al.pdf)
Supplement: Revised_supplemantary_infoKarasawa_et_al.pdf [file Revised_supplemantary_infoKarasawa_et_al.pdf]

## SUPPLEMENTARY INFORMATION

## Vitamin K2 Covalently Binds to Bak and Induces Bak-Mediated Apoptosis

Satoki Karasawa, Motoki Azuma, Takeshi Kasama, Satoshi Sakamoto, Yasuaki Kabe, Takeshi Imai, Yuki Yamaguchi, Keisuke Miyazawa, and Hiroshi Handa

Molecular pharmacology

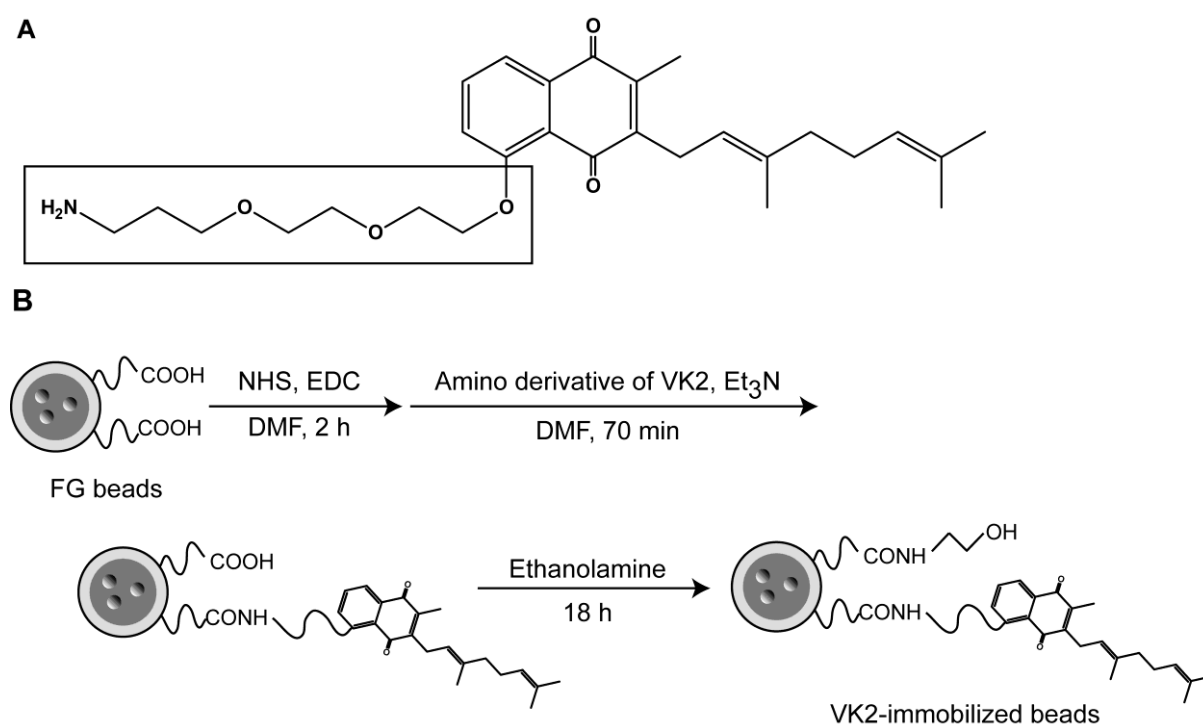

**Supplementary Fig. 1.** Diagram showing VK2 immobilization on FG beads. A, The amino derivative of VK2 (MK-2) used for immobilization. The open box indicates the side chain attached as a linker. B, The amino derivative of VK2 was immobilized on carboxylated FG beads using NHS and EDC. See Materials and Methods for details.

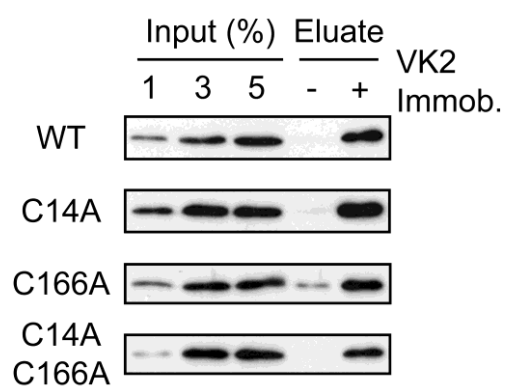

**Supplementary Fig. 2.** The cysteine-to-alanine mutants of Bak retain VK2-binding activity. Purified recombinant FLAG-Bak wild type (WT) or one of its mutants were incubated with VK2-conjugated beads (+) or control beads (-). Input and eluate materials were analyzed by immunoblotting.
